# Supplementary material for: Quantitative exploration of factors influencing psychotic disorder ailments in Nigeria
Source: PubMed Central journal article supplement (PMC5537424; doi:10.1016/j.dib.2017.07.046), 2017-07-24
Supplement: mmc1.pdf [file mmc1.pdf]

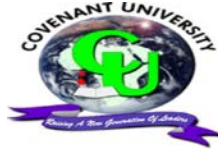

**COVENANT UNIVERSITY**  
**COLLEGE OF SCIENCE AND TECHNOLOGY**  
**DEPARTMENT OF MATHEMATICS**

CANAANLAND, KM 10, IDIROKO ROAD  
P.M.B 1023, OTA, OGUN STATE, NIGERIA

[www.covenantuniversity.edu.ng](http://www.covenantuniversity.edu.ng), [mat.covenantuniversity.edu.ng](http://mat.covenantuniversity.edu.ng)

**EXTERNAL MEMO**

---

**To:** Editor, Data in Brief  
**From:** Corresponding Author  
**Date:** 14<sup>th</sup> July, 2017  
**Subject:** **Conflict of Interest**

---

I thereby declare the absence of any conflict of interest among the authors.

The authors have read the final draft and unanimously agreed that the paper be sent for review.

**Hilary I. Okagbue**

Department of Mathematics, Covenant University, Ota.

Google Scholar: Hilary Izuchukwu Okagbue

Research Gate: Hilary Okagbue

Live DNA: 234.14453

Scopus ID: 56438006100

ORCID: 0000-0002-3779-9763
